# Supplementary material for: CYP1B1-AS1 Is a Novel Biomarker in Glioblastoma by Comprehensive Analysis
Source: Hindawi journal article supplement (doi:10.1155/2021/8565943), 2021-12-29
Supplement: f1 [file 8565943.f1.pdf]

**Table S1.** List of 75 survival-related eRNAs in GBM.

| gene            | KM       | gene            | KM       |
|-----------------|----------|-----------------|----------|
| AL356215.1      | 0.014281 | LINC02026       | 0.034819 |
| LINC01285       | 0.016247 | AL390198.1      | 0.018933 |
| LINC01615       | 0.004159 | AC103702.2      | 0.042944 |
| LINC00354       | 0.047878 | AC124852.1      | 0.0371   |
| LINC00886       | 0.004709 | IGHA2           | 0.01166  |
| FAM120AOS       | 0.044716 | MIR217HG        | 0.012982 |
| LEF1-AS1        | 0.000246 | AL021937.1      | 0.006565 |
| ZBED3-AS1       | 0.036844 | LBX1-AS1        | 0.025797 |
| AC015909.1      | 0.007557 | AC083864.2      | 0.044705 |
| LINC02036       | 0.015917 | LINC01088       | 0.023801 |
| LINC01111       | 0.018822 | AC113346.1      | 0.042853 |
| SLC44A3-<br>AS1 | 0.035431 | AP003555.1      | 0.01921  |
| ZNF337-<br>AS1  | 0.006093 | ALDH3B1         | 0.005684 |
| AC069281.1      | 0.025099 | AP001471.1      | 0.038946 |
| GCC2-AS1        | 0.001963 | AC078785.1      | 0.041339 |
| AP003469.2      | 0.017891 | AC007405.2      | 0.043425 |
| ZNRF2P2         | 0.039869 | LINC01529       | 0.034932 |
| BX284668.2      | 0.043445 | AP000424.1      | 0.032463 |
| HOTAIR          | 0.015604 | LRRC8C-DT       | 0.044126 |
| CRNDE           | 0.003139 | AP002761.1      | 0.035427 |
| AC092164.1      | 0.008008 | EDNRB-AS1       | 0.049895 |
| OSMR-AS1        | 0.017708 | LINC01248       | 0.046692 |
| LINC01574       | 0.003659 | LY6E-DT         | 0.038297 |
| MYOSLID         | 0.007847 | AC107223.1      | 0.004862 |
| AC004923.4      | 0.006884 | AL158151.1      | 0.003797 |
| PROX1-AS1       | 0.00902  | AC018866.2      | 0.000764 |
| CHST12          | 0.018207 | ZMIZ1-AS1       | 1.28E-05 |
| AC073316.2      | 0.041095 | AC003092.1      | 0.016754 |
| AF015262.1      | 0.023739 | LINC00665       | 0.016429 |
| LINC02324       | 0.016507 | AL355607.1      | 0.036478 |
| CYP1B1-<br>AS1  | 0.037351 | LINC02154       | 0.042814 |
| AC104596.1      | 0.045214 | MATN1-<br>AS1   | 0.008756 |
| LINC02773       | 0.004334 | HOXC-AS3        | 0.004981 |
| APELA           | 0.018438 | CYP4A22-<br>AS1 | 0.046964 |
| SPRY4-AS1       | 0.006354 | LINC00398       | 0.039217 |

---

|            |          |            |          |
|------------|----------|------------|----------|
| AC125613.1 | 0.047381 | AC093772.1 | 0.009892 |
| LINC02577  | 0.028153 | AC013287.1 | 0.024223 |

---
