# Supplementary material for: CYP1B1-AS1 Is a Novel Biomarker in Glioblastoma by Comprehensive Analysis
Source: Hindawi journal article supplement (doi:10.1155/2021/8565943), 2021-12-29
Supplement: f2 [file 8565943.f2.pdf]

**Table S2. List of the 40 eRNAs with a significant correlation with their target gene in GBM.**

| eRNA        | KM       | Target  | cor      | corPval  |
|-------------|----------|---------|----------|----------|
| SLC44A3-AS1 | 0.035431 | SLC44A3 | 0.703909 | 0        |
| SLC44A3-AS1 | 0.035431 | CNN3    | 0.554292 | 0        |
| SLC44A3-AS1 | 0.035431 | F3      | 0.436655 | 4.75E-09 |
| PROX1-AS1   | 0.00902  | PROX1   | 0.525114 | 0        |
| MATN1-AS1   | 0.008756 | MATN1   | 0.450114 | 1.38E-09 |
| LINC02773   | 0.004334 | BATF3   | 0.537959 | 5.49E-14 |
| LINC01248   | 0.046692 | SOX11   | 0.508528 | 1.96E-12 |
| CYP1B1-AS1  | 0.037351 | CYP1B1  | 0.615817 | 0        |
| LINC01088   | 0.023801 | PAQR3   | 0.440499 | 3.37E-09 |
| LINC01088   | 0.023801 | NAA11   | 0.7209   | 3.14E-28 |
| LEF1-AS1    | 0.000246 | LEF1    | 0.602401 | 0        |
| ZBED3-AS1   | 0.036844 | PDE8B   | 0.420478 | 1.92E-08 |
| ZBED3-AS1   | 0.036844 | ZBED3   | 0.494012 | 5.58E-12 |
| SPRY4-AS1   | 0.006354 | SPRY4   | 0.500407 | 0        |
| AC113346.1  | 0.042853 | MSX2    | 0.415599 | 2.12E-08 |
| LINC01574   | 0.003659 | SNCB    | 0.508427 | 1.98E-12 |
| LINC01574   | 0.003659 | UNC5A   | 0.4694   | 1.38E-10 |
| CHST12      | 0.018207 | IQCE    | 0.537409 | 0        |
| AC083864.2  | 0.044705 | EEPD1   | 0.598241 | 1.10E-17 |
| AC003092.1  | 0.016754 | TFPI2   | 0.597939 | 1.15E-17 |
| AP003555.1  | 0.01921  | ANO1    | 0.539298 | 4.62E-14 |
| AL356215.1  | 0.014281 | CD44    | 0.664652 | 8.94E-23 |
| HOTAIR      | 0.015604 | HOXC10  | 0.832982 | 1.59E-44 |
| HOTAIR      | 0.015604 | HOXC11  | 0.911022 | 9.26E-66 |
| HOTAIR      | 0.015604 | HOXC13  | 0.824268 | 7.36E-43 |
| HOTAIR      | 0.015604 | HOXC6   | 0.671807 | 2.11E-23 |
| HOXC-AS3    | 0.004981 | HOTAIR  | 0.795494 | 5.96E-38 |
| HOXC-AS3    | 0.004981 | HOXC11  | 0.820983 | 2.96E-42 |
| HOXC-AS3    | 0.004981 | HOXC13  | 0.728099 | 5.02E-29 |
| HOXC-AS3    | 0.004981 | HOXC6   | 0.739979 | 2.14E-30 |
| CRNDE       | 0.003139 | IRX5    | 0.746936 | 0        |
| LINC00665   | 0.016429 | ZFP14   | 0.623337 | 0        |
| LINC00665   | 0.016429 | ZFP82   | 0.459271 | 5.69E-10 |
| LINC00665   | 0.016429 | ZNF146  | 0.495282 | 3.88E-12 |
| LINC00665   | 0.016429 | ZNF260  | 0.739541 | 0        |

---

|                |          |        |          |          |
|----------------|----------|--------|----------|----------|
| ZNF337-<br>AS1 | 0.006093 | NINL   | 0.431535 | 7.46E-09 |
| AP001471.1     | 0.038946 | COL6A1 | 0.603759 | 4.60E-18 |
| AP001471.1     | 0.038946 | COL6A2 | 0.671878 | 2.08E-23 |
| AL021937.1     | 0.006565 | RFPL3  | 0.452123 | 7.65E-10 |

---
