# Supplementary material for: CYP1B1-AS1 Is a Novel Biomarker in Glioblastoma by Comprehensive Analysis
Source: Hindawi journal article supplement (doi:10.1155/2021/8565943), 2021-12-29
Supplement: f3 [file 8565943.f3.pdf]

Table S3. List of the 30 types of tumors associated with CYP1B1-AS1 and CYP1B1.

| eRNA       | Target | cancerType | cor      | corPval  |
|------------|--------|------------|----------|----------|
| CYP1B1-AS1 | CYP1B1 | BLCA       | 0.636178 | 5.26E-48 |
| CYP1B1-AS1 | CYP1B1 | BRCA       | 0.713951 | 0        |
| CYP1B1-AS1 | CYP1B1 | CESC       | 0.741945 | 0        |
| CYP1B1-AS1 | CYP1B1 | CHOL       | 0.654054 | 2.41E-05 |
| CYP1B1-AS1 | CYP1B1 | COAD       | 0.40391  | 6.56E-20 |
| CYP1B1-AS1 | CYP1B1 | DLBC       | 0.608988 | 7.00E-06 |
| CYP1B1-AS1 | CYP1B1 | ESCA       | 0.636957 | 0        |
| CYP1B1-AS1 | CYP1B1 | GBM        | 0.615817 | 0        |
| CYP1B1-AS1 | CYP1B1 | HNSC       | 0.768031 | 7.87E-99 |
| CYP1B1-AS1 | CYP1B1 | KICH       | 0.778059 | 0        |
| CYP1B1-AS1 | CYP1B1 | KIRC       | 0.669122 | 0        |
| CYP1B1-AS1 | CYP1B1 | KIRP       | 0.715333 | 0        |
| CYP1B1-AS1 | CYP1B1 | LAML       | 0.804346 | 0        |
| CYP1B1-AS1 | CYP1B1 | LIHC       | 0.608553 | 2.91E-39 |
| CYP1B1-AS1 | CYP1B1 | LUAD       | 0.481712 | 0        |
| CYP1B1-AS1 | CYP1B1 | LUSC       | 0.67923  | 4.79E-69 |
| CYP1B1-AS1 | CYP1B1 | MESO       | 0.732006 | 0        |
| CYP1B1-AS1 | CYP1B1 | OV         | 0.518474 | 0        |
| CYP1B1-AS1 | CYP1B1 | PAAD       | 0.766236 | 0        |
| CYP1B1-AS1 | CYP1B1 | PCPG       | 0.686669 | 7.37E-27 |
| CYP1B1-AS1 | CYP1B1 | PRAD       | 0.796631 | 0        |
| CYP1B1-AS1 | CYP1B1 | SARC       | 0.746608 | 0        |
| CYP1B1-AS1 | CYP1B1 | SKCM       | 0.644331 | 1.34E-56 |
| CYP1B1-AS1 | CYP1B1 | STAD       | 0.766112 | 0        |
| CYP1B1-AS1 | CYP1B1 | TGCT       | 0.483479 | 2.31E-10 |
| CYP1B1-AS1 | CYP1B1 | THCA       | 0.851273 | 0        |
| CYP1B1-AS1 | CYP1B1 | THYM       | 0.493106 | 1.90E-08 |
| CYP1B1-AS1 | CYP1B1 | UCEC       | 0.539296 | 1.13E-42 |
| CYP1B1-AS1 | CYP1B1 | UCS        | 0.737867 | 0        |

---

|            |        |     |          |              |
|------------|--------|-----|----------|--------------|
| CYP1B1-AS1 | CYP1B1 | UVM | 0.546204 | 1.60E-<br>07 |
|------------|--------|-----|----------|--------------|

---
